# Supplementary material
Source: publisher figshare collection journal article supplement (https://acs.figshare.com/ndownloader/files/4661290)
Supplement: Supplementary file 1 [file 4661290]

 
data_shelxl 
 
_audit_creation_method            SHELXL-97 
_chemical_name_systematic 
; 
 ? 
; 
_chemical_name_common             ? 
_chemical_melting_point           ? 
_chemical_formula_moiety          ? 
_chemical_formula_sum 
 'C19 H18 N2 O2 S' 
_chemical_formula_weight          338.41 
 
loop_ 
 _atom_type_symbol 
 _atom_type_description 
 _atom_type_scat_dispersion_real 
 _atom_type_scat_dispersion_imag 
 _atom_type_scat_source 
 'C'  'C'   0.0033   0.0016 
 'International Tables Vol C Tables 4.2.6.8 and 6.1.1.4' 
 'H'  'H'   0.0000   0.0000 
 'International Tables Vol C Tables 4.2.6.8 and 6.1.1.4' 
 'S'  'S'   0.1246   0.1234 
 'International Tables Vol C Tables 4.2.6.8 and 6.1.1.4' 
 'O'  'O'   0.0106   0.0060 
 'International Tables Vol C Tables 4.2.6.8 and 6.1.1.4' 
 'N'  'N'   0.0061   0.0033 
 'International Tables Vol C Tables 4.2.6.8 and 6.1.1.4' 
 
_symmetry_cell_setting            monoclinic 
_symmetry_space_group_name_H-M    'P21/n' 
 
loop_ 
 _symmetry_equiv_pos_as_xyz 
 'x, y, z' 
 '-x+1/2, y+1/2, -z+1/2' 
 '-x, -y, -z' 
 'x-1/2, -y-1/2, z-1/2' 
 
_cell_length_a                    9.6170(6) 
_cell_length_b                    7.2900(2) 
_cell_length_c                    23.937(1) 
_cell_angle_alpha                 90 
_cell_angle_beta                  93.455(2) 
_cell_angle_gamma                 90. 
_cell_volume                      1675.1(1) 
_cell_formula_units_Z             4 
_cell_measurement_temperature     293(2) 
_cell_measurement_reflns_used     3363 
_cell_measurement_theta_min       2.12 
_cell_measurement_theta_max       26.33 
 
_exptl_crystal_description        prism 
_exptl_crystal_colour             colorless 
_exptl_crystal_size_max           .5 
_exptl_crystal_size_mid           .3 
_exptl_crystal_size_min           .15 
_exptl_crystal_density_meas       ? 
_exptl_crystal_density_diffrn     1.342 
_exptl_crystal_density_method     'not measured' 
_exptl_crystal_F_000              712 
_exptl_absorpt_coefficient_mu     0.207 
_exptl_absorpt_correction_type    none 
_exptl_absorpt_correction_T_min   ? 
_exptl_absorpt_correction_T_max   ? 
_exptl_absorpt_process_details    ? 
 
_exptl_special_details 
; 
 ? 
; 
 
_diffrn_ambient_temperature       293(2) 
_diffrn_radiation_wavelength      0.71073 
_diffrn_radiation_type            MoK\a 
_diffrn_radiation_source          'fine-focus sealed tube' 
_diffrn_radiation_monochromator   graphite 
_diffrn_measurement_device_type   'KappaCCD' 
_diffrn_measurement_method        'Phi scan' 
_diffrn_detector_area_resol_mean  ? 
_diffrn_standards_number          ? 
_diffrn_standards_interval_count  ? 
_diffrn_standards_interval_time   ? 
_diffrn_standards_decay_%         ? 
_diffrn_reflns_number             3139 
_diffrn_reflns_av_R_equivalents   0.0000 
_diffrn_reflns_av_sigmaI/netI     0.0311 
_diffrn_reflns_limit_h_min        0 
_diffrn_reflns_limit_h_max        11 
_diffrn_reflns_limit_k_min        0 
_diffrn_reflns_limit_k_max        8 
_diffrn_reflns_limit_l_min        -29 
_diffrn_reflns_limit_l_max        29 
_diffrn_reflns_theta_min          2.24 
_diffrn_reflns_theta_max          26.33 
_reflns_number_total              3139 
_reflns_number_gt                 2720 
_reflns_threshold_expression      >2sigma(I) 
 
_computing_data_collection       'KappaCCD (Nonius, 1998)'  
_computing_cell_refinement       'Denzo and Scalepak (Otwinowski&Minor, 1997)'  
_computing_data_reduction        'Denzo and Scalepak (Otwinowski&Minor, 1997)'  
_computing_structure_solution   'SIR92 (Altomare et al., 1994)' 
_computing_structure_refinement   'SHELXL-97 (Sheldrick, 1997)' 
_computing_publication_material   'SHELXL-97 (Sheldrick, 1997)'  
 
_refine_special_details 
; 
 Refinement of F^2^ against ALL reflections.  The weighted R-factor wR and 
 goodness of fit S are based on F^2^, conventional R-factors R are based 
 on F, with F set to zero for negative F^2^. The threshold expression of 
 F^2^ > 2sigma(F^2^) is used only for calculating R-factors(gt) etc. and is 
 not relevant to the choice of reflections for refinement.  R-factors based 
 on F^2^ are statistically about twice as large as those based on F, and R- 
 factors based on ALL data will be even larger. 
; 
 
_refine_ls_structure_factor_coef  Fsqd  
_refine_ls_matrix_type            full 
_refine_ls_weighting_scheme       calc  
_refine_ls_weighting_details 
 'calc w=1/[\s^2^(Fo^2^)+(0.0745P)^2^+0.5276P] where P=(Fo^2^+2Fc^2^)/3' 
_atom_sites_solution_primary      direct 
_atom_sites_solution_secondary    difmap 
_atom_sites_solution_hydrogens    geom 
_refine_ls_hydrogen_treatment     mixed 
_refine_ls_extinction_method      none 
_refine_ls_extinction_coef        ? 
_refine_ls_number_reflns          3139 
_refine_ls_number_parameters      217 
_refine_ls_number_restraints      0 
_refine_ls_R_factor_all           0.0576 
_refine_ls_R_factor_gt            0.0437 
_refine_ls_wR_factor_ref          0.1495 
_refine_ls_wR_factor_gt           0.1266 
_refine_ls_goodness_of_fit_ref    1.181 
_refine_ls_restrained_S_all       1.181 
_refine_ls_shift/su_max           0.001 
_refine_ls_shift/su_mean          0.000 
_diffrn_measured_fraction_theta_max    0.924 
_diffrn_reflns_theta_full              26.33 
_diffrn_measured_fraction_theta_full   0.924 
_refine_diff_density_max    0.305 
_refine_diff_density_min   -0.450 
_refine_diff_density_rms    0.114 

_publ_section_references
;
Altamore, A., Cascarano, G., Giacovazzo, C., Guagliardi, A., Burla, M. C.,
Polidori, G. and Camalli, M. J. Appl. Cryst. (1994) 27, 435-436

Nonius (1998). Kappa CCD Reference Manual. Nonius B.V., P.O. Box 811, 2600
Av, Delft, The Netherlands.

Otwinowski, Z. and Minor, W. " Processing of X-ray Diffraction Data Collected
in Oscillation Mode ", Methods in Enzymology, Volume 276: Macromolecular
Crystallography, part A, p.307-326, 1997,C.W. Carter, Jr. & R.M. Sweet, Eds.,
Academic Press.

Sheldrick, G.M. (1997).  SHELXL97. Program for the refinement of crystal
structures.  Univ. of G\"ottingen, Germany.
;

 
loop_ 
 _atom_site_label 
 _atom_site_type_symbol 
 _atom_site_fract_x 
 _atom_site_fract_y 
 _atom_site_fract_z 
 _atom_site_U_iso_or_equiv 
 _atom_site_adp_type 
 _atom_site_occupancy 
 _atom_site_symmetry_multiplicity 
 _atom_site_calc_flag 
 _atom_site_refinement_flags 
 _atom_site_disorder_assembly 
 _atom_site_disorder_group 
S1 S 0.67385(7) 0.24657(8) 0.40306(2) 0.0537(2) Uani 1 1 d . . . 
O1 O 0.48770(16) -0.2887(2) 0.43740(7) 0.0487(4) Uani 1 1 d . . . 
O2 O 0.35137(14) -0.04549(19) 0.32220(6) 0.0426(4) Uani 1 1 d . . . 
N1 N 0.65264(18) -0.1040(2) 0.36240(7) 0.0399(4) Uani 1 1 d . . . 
N2 N 0.58965(16) 0.1456(2) 0.30390(7) 0.0348(4) Uani 1 1 d . . . 
C1 C 0.7101(2) -0.1639(3) 0.41500(8) 0.0398(5) Uani 1 1 d . . . 
C2 C 0.8517(2) -0.1468(3) 0.42960(10) 0.0520(6) Uani 1 1 d . . . 
H2 H 0.9178 -0.0762 0.4010 0.062 Uiso 1 1 d R . . 
C3 C 0.9095(3) -0.2246(4) 0.47845(11) 0.0598(6) Uani 1 1 d . . . 
H3 H 1.0212 -0.2146 0.4911 0.072 Uiso 1 1 d R . . 
C4 C 0.8270(3) -0.3209(4) 0.51324(10) 0.0589(6) Uani 1 1 d . . . 
H4 H 0.8659 -0.3806 0.5514 0.071 Uiso 1 1 d R . . 
C5 C 0.6851(3) -0.3373(3) 0.50008(9) 0.0517(6) Uani 1 1 d . . . 
H5 H 0.6234 -0.4186 0.5273 0.062 Uiso 1 1 d R . . 
C6 C 0.6270(2) -0.2586(3) 0.45147(9) 0.0407(5) Uani 1 1 d . . . 
C7 C 0.3977(2) -0.1318(3) 0.44062(9) 0.0479(5) Uani 1 1 d . . . 
H7A H 0.4550 -0.0307 0.4285 0.057 Uiso 1 1 d R . . 
H7B H 0.3736 -0.1124 0.4799 0.057 Uiso 1 1 d R . . 
C8 C 0.2661(2) -0.1715(3) 0.40518(11) 0.0522(6) Uani 1 1 d . . . 
H8A H 0.2031 -0.0489 0.4128 0.063 Uiso 1 1 d R . . 
H8B H 0.2212 -0.2850 0.4206 0.063 Uiso 1 1 d R . . 
C9 C 0.2898(2) -0.2078(3) 0.34472(10) 0.0464(5) Uani 1 1 d . . . 
H9A H 0.2011 -0.2421 0.3211 0.056 Uiso 1 1 d R . . 
H9B H 0.3630 -0.3180 0.3371 0.056 Uiso 1 1 d R . . 
C10 C 0.40231(19) -0.0626(3) 0.27060(8) 0.0356(4) Uani 1 1 d . . . 
C11 C 0.3387(2) -0.1661(3) 0.22758(10) 0.0451(5) Uani 1 1 d . . . 
H11 H 0.2552 -0.2364 0.2361 0.054 Uiso 1 1 d R . . 
C12 C 0.3912(3) -0.1685(3) 0.17519(10) 0.0531(6) Uani 1 1 d . . . 
H12 H 0.3399 -0.2426 0.1441 0.064 Uiso 1 1 d R . . 
C13 C 0.5094(2) -0.0685(3) 0.16475(9) 0.0522(6) Uani 1 1 d . . . 
H13 H 0.5584 -0.0741 0.1244 0.063 Uiso 1 1 d R . . 
C14 C 0.5760(2) 0.0321(3) 0.20781(9) 0.0430(5) Uani 1 1 d . . . 
H14 H 0.6652 0.1220 0.2008 0.052 Uiso 1 1 d R . . 
C15 C 0.52323(18) 0.0363(2) 0.26015(8) 0.0336(4) Uani 1 1 d . . . 
C16 C 0.5856(2) 0.3389(3) 0.30368(9) 0.0405(5) Uani 1 1 d . . . 
C17 C 0.6243(2) 0.4106(3) 0.35299(10) 0.0519(6) Uani 1 1 d . . . 
H17 H 0.6342 0.5414 0.3596 0.062 Uiso 1 1 d R . . 
C18 C 0.63888(19) 0.0688(3) 0.35399(8) 0.0352(4) Uani 1 1 d . . . 
C19 C 0.5510(3) 0.4442(3) 0.25152(12) 0.0562(6) Uani 1 1 d . . . 
H19A H 0.5599 0.5791 0.2619 0.067 Uiso 1 1 d R . . 
H19B H 0.4591 0.4274 0.2363 0.067 Uiso 1 1 d R . . 
H19C H 0.6217 0.4207 0.2199 0.067 Uiso 1 1 d R . . 
 
loop_ 
 _atom_site_aniso_label 
 _atom_site_aniso_U_11 
 _atom_site_aniso_U_22 
 _atom_site_aniso_U_33 
 _atom_site_aniso_U_23 
 _atom_site_aniso_U_13 
 _atom_site_aniso_U_12 
S1 0.0819(5) 0.0446(4) 0.0354(3) -0.0112(2) 0.0103(3) -0.0225(3) 
O1 0.0519(9) 0.0409(8) 0.0524(9) 0.0041(6) -0.0048(7) -0.0089(6) 
O2 0.0462(8) 0.0355(8) 0.0474(9) 0.0012(6) 0.0128(6) -0.0041(6) 
N1 0.0550(10) 0.0348(9) 0.0292(8) -0.0003(6) -0.0033(7) -0.0072(7) 
N2 0.0419(8) 0.0280(8) 0.0346(8) -0.0013(6) 0.0036(6) -0.0053(6) 
C1 0.0547(12) 0.0349(11) 0.0293(9) -0.0029(7) -0.0025(8) -0.0070(8) 
C2 0.0524(13) 0.0612(15) 0.0419(12) 0.0004(10) -0.0016(9) -0.0105(10) 
C3 0.0543(14) 0.0746(17) 0.0488(14) 0.0026(12) -0.0096(11) -0.0036(12) 
C4 0.0690(15) 0.0671(16) 0.0389(12) 0.0078(11) -0.0115(11) 0.0006(12) 
C5 0.0669(14) 0.0514(14) 0.0363(11) 0.0076(9) -0.0015(10) -0.0071(10) 
C6 0.0510(11) 0.0373(11) 0.0331(10) -0.0019(7) -0.0028(8) -0.0084(8) 
C7 0.0575(12) 0.0497(13) 0.0379(11) -0.0013(9) 0.0148(9) -0.0061(10) 
C8 0.0421(11) 0.0559(14) 0.0603(15) 0.0127(11) 0.0157(10) -0.0053(9) 
C9 0.0396(10) 0.0459(12) 0.0529(13) 0.0112(9) -0.0033(9) -0.0144(9) 
C10 0.0364(9) 0.0299(10) 0.0401(10) 0.0004(7) -0.0005(8) 0.0041(7) 
C11 0.0435(11) 0.0388(12) 0.0516(13) -0.0024(9) -0.0084(9) -0.0029(8) 
C12 0.0608(14) 0.0517(14) 0.0448(12) -0.0088(10) -0.0148(10) 0.0044(10) 
C13 0.0575(13) 0.0648(15) 0.0338(11) -0.0053(10) -0.0025(9) 0.0080(11) 
C14 0.0429(10) 0.0506(12) 0.0355(11) 0.0013(8) 0.0018(8) 0.0060(9) 
C15 0.0359(9) 0.0303(10) 0.0341(9) -0.0004(7) -0.0014(7) 0.0029(7) 
C16 0.0398(10) 0.0299(10) 0.0528(12) 0.0007(8) 0.0120(9) -0.0048(7) 
C17 0.0686(14) 0.0306(11) 0.0580(14) -0.0087(9) 0.0162(11) -0.0116(10) 
C18 0.0404(10) 0.0366(11) 0.0291(9) -0.0042(7) 0.0060(7) -0.0102(7) 
C19 0.0550(13) 0.0393(13) 0.0730(17) 0.0127(11) -0.0065(11) -0.0027(9) 
 
_geom_special_details 
; 
 All esds (except the esd in the dihedral angle between two l.s. planes) 
 are estimated using the full covariance matrix.  The cell esds are taken 
 into account individually in the estimation of esds in distances, angles 
 and torsion angles; correlations between esds in cell parameters are only 
 used when they are defined by crystal symmetry.  An approximate (isotropic) 
 treatment of cell esds is used for estimating esds involving l.s. planes. 
; 
 
loop_ 
 _geom_bond_atom_site_label_1 
 _geom_bond_atom_site_label_2 
 _geom_bond_distance 
 _geom_bond_site_symmetry_2 
 _geom_bond_publ_flag 
S1 C17 1.739(3) . ? 
S1 C18 1.7678(19) . ? 
O1 C6 1.379(3) . ? 
O1 C7 1.439(3) . ? 
O2 C10 1.362(2) . ? 
O2 C9 1.442(2) . ? 
N1 C18 1.281(3) . ? 
N1 C1 1.413(3) . ? 
N2 C18 1.381(2) . ? 
N2 C16 1.410(3) . ? 
N2 C15 1.435(2) . ? 
C1 C2 1.391(3) . ? 
C1 C6 1.401(3) . ? 
C2 C3 1.386(3) . ? 
C2 H2 1.0910 . ? 
C3 C4 1.376(4) . ? 
C3 H3 1.1009 . ? 
C4 C5 1.388(4) . ? 
C4 H4 1.0596 . ? 
C5 C6 1.385(3) . ? 
C5 H5 1.0830 . ? 
C7 C8 1.509(3) . ? 
C7 H7A 0.9755 . ? 
C7 H7B 0.9914 . ? 
C8 C9 1.502(3) . ? 
C8 H8A 1.1016 . ? 
C8 H8B 1.0131 . ? 
C9 H9A 1.0259 . ? 
C9 H9B 1.0902 . ? 
C10 C11 1.389(3) . ? 
C10 C15 1.403(3) . ? 
C11 C12 1.380(3) . ? 
C11 H11 0.9843 . ? 
C12 C13 1.385(4) . ? 
C12 H12 1.0227 . ? 
C13 C14 1.390(3) . ? 
C13 H13 1.1011 . ? 
C14 C15 1.380(3) . ? 
C14 H14 1.1006 . ? 
C16 C17 1.324(3) . ? 
C16 C19 1.486(3) . ? 
C17 H17 0.9707 . ? 
C19 H19A 1.0166 . ? 
C19 H19B 0.9436 . ? 
C19 H19C 1.0604 . ? 
 
loop_ 
 _geom_angle_atom_site_label_1 
 _geom_angle_atom_site_label_2 
 _geom_angle_atom_site_label_3 
 _geom_angle 
 _geom_angle_site_symmetry_1 
 _geom_angle_site_symmetry_3 
 _geom_angle_publ_flag 
C17 S1 C18 90.74(10) . . ? 
C6 O1 C7 116.02(16) . . ? 
C10 O2 C9 116.24(16) . . ? 
C18 N1 C1 118.35(17) . . ? 
C18 N2 C16 114.62(16) . . ? 
C18 N2 C15 121.50(15) . . ? 
C16 N2 C15 122.80(16) . . ? 
C2 C1 C6 118.32(19) . . ? 
C2 C1 N1 121.36(19) . . ? 
C6 C1 N1 120.03(18) . . ? 
C3 C2 C1 120.8(2) . . ? 
C3 C2 H2 120.3 . . ? 
C1 C2 H2 118.9 . . ? 
C4 C3 C2 120.2(2) . . ? 
C4 C3 H3 117.1 . . ? 
C2 C3 H3 122.7 . . ? 
C3 C4 C5 120.1(2) . . ? 
C3 C4 H4 123.0 . . ? 
C5 C4 H4 116.8 . . ? 
C6 C5 C4 119.8(2) . . ? 
C6 C5 H5 121.6 . . ? 
C4 C5 H5 118.6 . . ? 
O1 C6 C5 118.43(18) . . ? 
O1 C6 C1 120.58(18) . . ? 
C5 C6 C1 120.8(2) . . ? 
O1 C7 C8 107.70(18) . . ? 
O1 C7 H7A 103.4 . . ? 
C8 C7 H7A 116.6 . . ? 
O1 C7 H7B 109.9 . . ? 
C8 C7 H7B 108.9 . . ? 
H7A C7 H7B 110.1 . . ? 
C9 C8 C7 113.83(18) . . ? 
C9 C8 H8A 114.8 . . ? 
C7 C8 H8A 101.6 . . ? 
C9 C8 H8B 107.5 . . ? 
C7 C8 H8B 108.2 . . ? 
H8A C8 H8B 110.6 . . ? 
O2 C9 C8 107.79(18) . . ? 
O2 C9 H9A 109.9 . . ? 
C8 C9 H9A 113.8 . . ? 
O2 C9 H9B 105.0 . . ? 
C8 C9 H9B 115.3 . . ? 
H9A C9 H9B 104.6 . . ? 
O2 C10 C11 123.77(18) . . ? 
O2 C10 C15 117.52(17) . . ? 
C11 C10 C15 118.67(19) . . ? 
C12 C11 C10 120.8(2) . . ? 
C12 C11 H11 121.9 . . ? 
C10 C11 H11 117.3 . . ? 
C11 C12 C13 120.4(2) . . ? 
C11 C12 H12 118.8 . . ? 
C13 C12 H12 120.7 . . ? 
C12 C13 C14 119.4(2) . . ? 
C12 C13 H13 122.6 . . ? 
C14 C13 H13 117.9 . . ? 
C15 C14 C13 120.4(2) . . ? 
C15 C14 H14 117.2 . . ? 
C13 C14 H14 122.1 . . ? 
C14 C15 C10 120.30(18) . . ? 
C14 C15 N2 120.19(17) . . ? 
C10 C15 N2 119.49(17) . . ? 
C17 C16 N2 112.7(2) . . ? 
C17 C16 C19 125.6(2) . . ? 
N2 C16 C19 121.62(19) . . ? 
C16 C17 S1 113.19(17) . . ? 
C16 C17 H17 123.6 . . ? 
S1 C17 H17 122.8 . . ? 
N1 C18 N2 124.19(17) . . ? 
N1 C18 S1 127.06(15) . . ? 
N2 C18 S1 108.73(14) . . ? 
C16 C19 H19A 106.4 . . ? 
C16 C19 H19B 114.4 . . ? 
H19A C19 H19B 106.4 . . ? 
C16 C19 H19C 113.2 . . ? 
H19A C19 H19C 106.5 . . ? 
H19B C19 H19C 109.3 . . ? 
 
